# Supplementary material for: Student-Scientist Curriculum: Integrating Inquiry-Based Research Experiences and Professional Development Activities into an Introductory Biology Laboratory Course
Source: PubMed Central journal article supplement — J Microbiol Biol Educ. 2020 Dec 21;21(3):21.3.74. doi: 10.1128/jmbe.v21i3.2225 (PMC7747884; doi:10.1128/jmbe.v21i3.2225), 2020-12-21

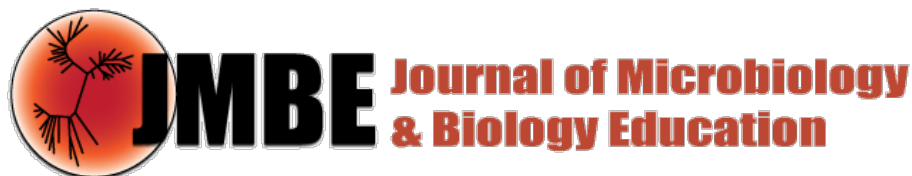

---

## Supplemental Materials

for

### Student-Scientist Curriculum: Integrating Inquiry-Based Research Experiences and Professional Development Activities into an Introductory Biology Laboratory Course

Porché L. Spence<sup>1\*</sup>, Ruth S. Phillips<sup>1,2</sup>, Akeem R. McAllister<sup>1</sup>, Sandra L. White<sup>1</sup>, and Gail P. Hollowell<sup>1</sup>

<sup>1</sup>*Biological and Biomedical Sciences, North Carolina Central University, Durham, NC 27707;*

<sup>2</sup>*Biology Department, Syracuse University, Syracuse, NY 13244*

#### Table of Contents (Total pages 29)

|             |                                                                                       |
|-------------|---------------------------------------------------------------------------------------|
| Appendix 1  | Syllabus                                                                              |
| Appendix 2  | Introduction to statistics and data analysis worksheet and answer key                 |
| Appendix 3  | Lactose intolerance lab setup                                                         |
| Appendix 4  | Lactose intolerance research proposal grading rubric                                  |
| Appendix 5  | Lab journal grading rubric                                                            |
| Appendix 6  | Mini-poster evaluations and mock review panels                                        |
| Appendix 7  | Mock poster review panel follow-up self-reflection worksheet                          |
| Appendix 8  | Lactose intolerance mini-poster grading rubric                                        |
| Appendix 9  | Preparation sheet for enzyme inhibition and yeast microscopy lab activity             |
| Appendix 10 | Altering enzyme activity on yeast cells, cell viability, and microscopy lab worksheet |
| Appendix 11 | Alcohol fermentation and enzyme inhibition research proposal grading rubric           |
| Appendix 12 | Alcohol fermentation and enzyme inhibition mini-poster grading rubric                 |
| Appendix 13 | SSP research proposal preparation follow-up self-reflection worksheet                 |
| Appendix 14 | SSP research proposal grading rubric and mock peer-review panel feedback worksheet    |
| Appendix 15 | SSP poster grading rubric                                                             |
| Appendix 16 | Example of SSP poster competition winner (“Exemplary”)                                |
| Appendix 17 | Example of SSP poster categorized as “Competent”                                      |
| Appendix 18 | Example of SSP poster categorized as “Developing”                                     |
| Appendix 19 | Student self-reflection responses about student-scientist curriculum                  |

\*Corresponding author. Mailing address: 1801 Fayetteville St.,  
Department of Biological and Biomedical Sciences, North Carolina  
Central University, Durham, NC 27707. Phone: 919-530-5474.  
E-mail: [plspence@ncu.edu](mailto:plspence@ncu.edu) or [porchespence@gmail.com](mailto:porchespence@gmail.com)  
Received: 27 July 2020, Accepted: 2 November 2020,  
Published: 21 December 2020

©2020 Author(s). Published by the American Society for Microbiology. This is an Open Access article distributed under the terms of the Creative Commons Attribution-Noncommercial-NoDerivatives 4.0 International license (<https://creativecommons.org/licenses/by-nc-nd/4.0/>) and <https://creativecommons.org/licenses/by-nc-nd/4.0/legalcode>, which grants the public the nonexclusive right to copy, distribute, or display the published work.

Appendix 1: Syllabus

**Sample Syllabus: BIOL 1202 - Principles of Biology: Molecules & Cells**  
Student-Scientist Lab Curriculum

**LABORATORY INSTRUCTOR**

Name:  
Email  
Phone:  
Office Hours:

**TEACHING ASSISTANTS**

Name:  
Email  
Phone:  
Office Hours:

**BIG IDEAS:** *Students will understand:*

1. **ENERGY:** All living organisms need a continual supply of energy for growth and reproduction.
2. **NATURE OF SCIENCE:** The application of the scientific process enhances the interpretation of the biological concepts.
3. **BIOLOGICAL SYSTEMS:** All life on earth shares the basic characteristics of life and is interconnected.

**LEARNING OBJECTIVES:** Upon completion the student-scientist curricula, students will be able to:

- use Microsoft Excel to analyze data and create graphs
- properly operate a micropipette
- properly operate a compound microscope
- interpret data
- document inquiry-based research in a laboratory journal
- prepare research proposals for hypothesis-driven inquiry-based research experiments
- create posters to communicate their scientific findings
- exhibit and collaboratively present student-scientist poster to peers and STEM faculty
- design and conduct inquiry-based experiments using the scientific process

**SUPPLEMENTARY RESOURCES:** *These books are recommended for additional reading.*

- How to Write and Illustrate a Scientific Paper by Bjorn Gustavii, 2008, 2<sup>nd</sup> ed.
- Statistics Explained: An Introductory Guide for Life Sciences by Steve McKillup, 2005.

**LAB GRADE EVALUATION:** As indicated in your BIOL \_\_\_\_ course syllabus, your lab participation grade is \_\_\_\_% of your overall BIOL \_\_\_\_ grade. Your lab grade will be determined based on the table below:

| <b>LABORATORY PARTICIPATION GRADE</b> |       |
|---------------------------------------|-------|
| Lab Attendance: ____%                 | ____% |
| Pre-Lab Assignments: ____%            |       |
| Lab Journal: ____%                    |       |
| Mini-Posters: ____%                   |       |
| Student-Scientist Project: ____%      |       |

# STUDENT-SCIENTIST CURRICULUM LABORATORY SCHEDULE

| DATE   | LAB SKILLS                                                                                                   | TOPIC                                                                    | LABORATORY EXERCISE                                                                                                                                                                                                                                                                          |
|--------|--------------------------------------------------------------------------------------------------------------|--------------------------------------------------------------------------|----------------------------------------------------------------------------------------------------------------------------------------------------------------------------------------------------------------------------------------------------------------------------------------------|
| Jan 12 | Lab Safety                                                                                                   | Introduction to CURE Lab<br>Lab Safety Rules<br>Assessments & Waivers    | Laboratory Safety & Rules<br>Assessments<br>Waivers                                                                                                                                                                                                                                          |
| Jan 19 | Statistics<br>Data Analysis                                                                                  | Data Analyses<br>Microsoft Excel<br>Interpreting Figures                 | <b>In Lab Assignments: <i>Short Course Tutorials:</i></b> HHMI Microsoft Excel Data Analysis – Blackboard Assignment & <b><i>Worksheet:</i></b> Intro to Statistics and Data Analysis                                                                                                        |
| Jan 26 | Scientific Method<br>Research Proposal                                                                       | Scientific Method<br>Research Proposals                                  | <b>In Lab Assignment:</b> Research Proposal<br>Intro to Statistics and Data Analysis Worksheet <b>DUE</b><br>Short Course Tutorials : HHMI Microsoft Excel Data Analysis <b>DUE</b> (Blackboard)                                                                                             |
| Feb 2  | Micropipettes<br>Lab Journals                                                                                | Enzyme Activity<br>Micropipette<br>Lab Journals                          | <b>Pre-lab Assignment:</b> Micropipette Video and Questions<br>Lactose Intolerance Research Proposal DUE<br><b>In Lab Assignment:</b> Lactase Activity Assay<br><i>Class Data for Analysis</i>                                                                                               |
| Feb 9  | Mini-Posters                                                                                                 | Mini-Posters<br>Results and Discussion                                   | <b>Pre-Lab:</b> Complete Lab Journal<br><b>In Lab Assignment:</b> Revisit data analysis & Create Mini-Poster                                                                                                                                                                                 |
| Feb 16 | Microscopy<br>Micropipettes<br>Wet Mount<br>Slides                                                           | Microscopy<br>Micropipettes<br>Yeast<br>Enzyme Inhibition                | <b>Pre-lab Assignment:</b> Microscope Video and Questions<br><b>In Lab Assignment:</b> Microscopy, Enzyme Inhibition and Cell Viability Assay<br>Lactose Intolerance – Collaborative Mini-Poster DUE<br>Individual Lab Journal DUE<br>Peer-Self Reflection Worksheet <b>Due</b>              |
| Feb 23 | Micropipette<br>pH Strips<br>Statistics<br>Data Analysis<br>Mini-Poster<br>Lab Journals<br>Research Proposal | Enzyme Inhibition<br>Yeast Fermentation                                  | <b>Pre lab Assignment:</b> <i>Alcohol Fermentation and Enzyme Inhibition Research Proposal “Which Beer is Best”</i><br><b>In Lab Assignment:</b> <i>Cell viability assay followed by Fermentation Assay - Class Data for Analysis</i><br>Microscopy and Cell Viability Assignment <b>DUE</b> |
| Mar 2  | Scientific Method<br>Microscope                                                                              | Student-Scientist Project (SSP)<br>Research Proposal                     | <b>In Lab Assignment:</b> Prepare Research Proposal for SSP<br>Alcohol Fermentation and Enzyme Inhibition Group Mini-Posters <b>DUE</b><br>Alcohol Fermentation and Enzyme Inhibition Lab Journal <b>Due</b><br>Peer-Self Reflection Worksheet <b>Due</b>                                    |
| Mar 9  | Research Proposal                                                                                            | SSP Research Proposal<br>Review                                          | <b>Pre-lab Assignment:</b> Draft of Research Proposal for SSP<br><b>In Lab Assignment:</b> Mock Review Panel of SSP Proposals                                                                                                                                                                |
| Mar 23 | Micropipette<br>Microscope<br>Lab Journals                                                                   | Student-Scientist Projects<br>Cell Viability Assay<br>Fermentation Assay | <b>Lab Assignment:</b> Conduct Student-Scientist Project<br><b>Revised SSP Research Proposal - DUE</b><br><b>The data collected will be used for data analysis</b>                                                                                                                           |
| Mar 30 |                                                                                                              |                                                                          |                                                                                                                                                                                                                                                                                              |
| Apr 6  |                                                                                                              |                                                                          |                                                                                                                                                                                                                                                                                              |
| Apr 13 | Final Posters                                                                                                | Create SSP (Final) Poster                                                | <b>Lab Assignment:</b> Create Student-Scientist Posters                                                                                                                                                                                                                                      |
| Apr 20 | Final Posters                                                                                                | Post-Assessments<br>Revise SSP (Final) Posters                           | <b>Lab Assignment:</b> Revise Student-Scientist Posters<br><b>Construct Final Posters – Due Mon April 14 by 12 pm</b>                                                                                                                                                                        |
| Apr 27 | Final Poster Presentations                                                                                   | SSP Poster Presentation<br>Competition                                   | <b>Simulate a Poster Competition at a Scientific Conference</b><br>Student-Scientist Project Lab Journals DUE<br>Peer-Self Reflection Worksheet <b>Due</b>                                                                                                                                   |

Name \_\_\_\_\_

Lab Section \_\_\_\_\_

## INTRODUCTION to STATISTICS and DATA ANALYSIS

**Instructions:** Use the raw data below to complete the data tables provided below. Use the background information to explain your results.

**Background Information:** *Lactose intolerance* is a human digestive system disorder that occurs when the cells in the small intestine produce low amounts of the enzyme lactase. Lactase is needed in order to hydrolyze the milk sugar lactose; it breaks lactose sugar down into glucose and galactose. These monosaccharides (glucose and galactose) are absorbed from the intestine into the bloodstream. When a *lactose intolerant* individual eats or drinks dairy products containing a large amount of lactose, there is not enough lactase in their small intestine to hydrolyze the lactose. Therefore, the lactose passes into their colon without being broken down and the bacteria living in the colon begin to ferment the lactose. Unfortunately, when bacteria metabolize the lactose it produces a lot of gas, which can cause cramping, pain, gassiness, and diarrhea. While most human infants produce lactase, not all adults do. Lactose intolerance between different racial groups is highly variable, but unusually rare in Northern European and some African countries. Populations that produce lactase into adulthood tend to be those with a long history of drinking fresh milk. However, the United States is a multicultural population with ancestries from all over the world. Even Though the percentage of lactose intolerance adults in the United States ranges between 11 to 20%, this number reflects an average across people of many different ethnic backgrounds (Jarvis and Miller, 2002 and Sahi 1994).

### References:

- Jarvis, JK. and GD Miller. 2002. Overcoming the Barrier of Lactose Intolerance to Reduce Health Disparities. Journal of the National Medical Association. 94:55-66
- Sahi, T. 1994. Hypolactasia and Lactase Persistence: Historical Review and Terminology. Scandinavian Journal of Gastroenterology. 29(202): 1-6.

| Patient Number | Race              | Glucose Conc. After 7mins (mg/dL) |
|----------------|-------------------|-----------------------------------|
| 1              | Hispanic-American | 500                               |
| 2              | Hispanic-American | 500                               |
| 3              | Hispanic-American | 1000                              |
| 4              | Hispanic-American | 500                               |
| 5              | Hispanic-American | 1000                              |
| 1              | African-American  | 250                               |
| 2              | African-American  | 250                               |
| 3              | African-American  | 500                               |
| 4              | African-American  | 100                               |
| 5              | African-American  | 1000                              |
| 1              | European-American | 1000                              |
| 2              | European-American | 1000                              |
| 3              | European-American | 1000                              |
| 4              | European-American | 500                               |
| 5              | European-American | 1000                              |
| 1              | Asian-American    | 0                                 |
| 2              | Asian-American    | 0                                 |
| 3              | Asian-American    | 250                               |
| 4              | Asian-American    | 500                               |
| 5              | Asian-American    | 0                                 |

- Using Excel, calculate the sample size, mean, standard deviation, and standard error for each racial group. Input the data in the table below. (16pts)

| Sample            | Sample Size (n) | Mean (mg/dL) | Standard Deviation | Standard Error |
|-------------------|-----------------|--------------|--------------------|----------------|
| Hispanic American |                 |              |                    |                |
| African American  |                 |              |                    |                |
| European American |                 |              |                    |                |
| Asian American    |                 |              |                    |                |

- We don't know what results to expect for any of these groups, so we don't have a control group for comparison. Instead, you should compare the different groups against each other using the online t-test calculator (<http://www.graphpad.com/quickcalcs/ttest1/?Format=SEM>). Input the p-values in data table below. (12 pts)

| t-test p-values   | Hispanic-American | African-American | European-American | Asian-American |
|-------------------|-------------------|------------------|-------------------|----------------|
| Hispanic-American |                   |                  |                   |                |
| African-American  |                   |                  |                   |                |
| European-American |                   |                  |                   |                |
| Asian-American    |                   |                  |                   |                |

- Using excel, create a bar graph with the standard error bars. The graph can be attached to this assignment on a separate sheet. The bar graph should include the x and y axes with titles and units, a legend if needed, graph title. (20 pts)

### Explanation of Data

- A brief overall summary of your data. Discussion the descriptive statistics provided in table and the graph created using excel. (12 pts)
- What does your p-value tell you about the different ethnic groups? Discuss if these groups are significantly different or not? (10 pts)

**INTRODUCTION to STATISTICS and DATA ANALYSIS - Key**

**Instructions:** Use the raw data below to complete the data tables provided below. Use the background information to explain your results.

**Background Information:** *Lactose intolerance* is a human digestive system disorder that occurs when the cells in the small intestine produce low amounts of the enzyme lactase. Lactase is needed in order to hydrolyze the milk sugar lactose; it breaks lactose sugar down into glucose and galactose. These monosaccharides (glucose and galactose) are absorbed from the intestine into the bloodstream. When a *lactose intolerant* individual eats or drinks dairy products containing a large amount of lactose, there is not enough lactase in their small intestine to hydrolyze the lactose. Therefore, the lactose passes into their colon without being broken down and the bacteria living in the colon begin to ferment the lactose. Unfortunately, when bacteria metabolize the lactose it produces a lot of gas, which can cause cramping, pain, gassiness, and diarrhea. While most human infants produce lactase, not all adults do. Lactose intolerance between different racial groups is highly variable, but unusually rare in Northern European and some African countries. Populations that produce lactase into adulthood tend to be those with a long history of drinking fresh milk. However, the United States is a multicultural population with ancestries from all over the world. Even Though the percentage of lactose intolerance adults in the United States ranges between 11 to 20%, this number reflects an average across people of many different ethnic backgrounds (Jarvis and Miller, 2002 and Sahi 1994).

**References:**

- Jarvis, JK. and GD Miller. 2002. Overcoming the Barrier of Lactose Intolerance to Reduce Health Disparities. Journal of the National Medical Association. 94:55-66
- Sahi, T. 1994. Hypolactasia and Lactase Persistence: Historical Review and Terminology. Scandinavian Journal of Gastroenterology. 29(202): 1-6.

| Patient Number | Race              | Glucose Conc. After 7mins (mg/dL) |
|----------------|-------------------|-----------------------------------|
| 1              | Hispanic-American | 500                               |
| 2              | Hispanic-American | 500                               |
| 3              | Hispanic-American | 1000                              |
| 4              | Hispanic-American | 500                               |
| 5              | Hispanic-American | 1000                              |
| 1              | African-American  | 250                               |
| 2              | African-American  | 250                               |
| 3              | African-American  | 500                               |
| 4              | African-American  | 100                               |
| 5              | African-American  | 1000                              |
| 1              | European-American | 1000                              |
| 2              | European-American | 1000                              |
| 3              | European-American | 1000                              |
| 4              | European-American | 500                               |
| 5              | European-American | 1000                              |
| 1              | Asian-American    | 0                                 |
| 2              | Asian-American    | 0                                 |
| 3              | Asian-American    | 250                               |
| 4              | Asian-American    | 500                               |
| 5              | Asian-American    | 0                                 |

4. Using Excel, calculate the sample size, mean, standard deviation, and standard error for each racial group. Input the data in the table below. (16pts)

| Sample            | Sample Size (n) | Mean (mg/dL) | Standard Deviation | Standard Error |
|-------------------|-----------------|--------------|--------------------|----------------|
| Hispanic American | 5               | 700          | 273.86             | 122.47         |
| African American  | 5               | 420          | 354.61             | 158.59         |
| European American | 5               | 900          | 223.61             | 100            |
| Asian American    | 5               | 150          | 223.61             | 100            |

5. We don't know what results to expect for any of these groups, so we don't have a control group for comparison. Instead, you should compare the different groups against each other using the online t-test calculator (<http://www.graphpad.com/quickcalcs/ttest1/?Format=SEM>). Input the p-values in data table below. (12 pts)

| t-test p-values   | Hispanic-American | African-American | European-American | Asian-American |
|-------------------|-------------------|------------------|-------------------|----------------|
| Hispanic-American |                   | 0.1998           | 0.2415            | 0.0083         |
| African-American  |                   |                  | 0.0336            | 0.1878         |
| European-American |                   |                  |                   | 0.0007         |
| Asian-American    |                   |                  |                   |                |

6. Using excel, create a bar graph with the standard error bars. The graph can be attached to this assignment on a separate sheet. The bar graph should include the x and y axes with titles and units, a legend if needed, graph title. (20 pts)

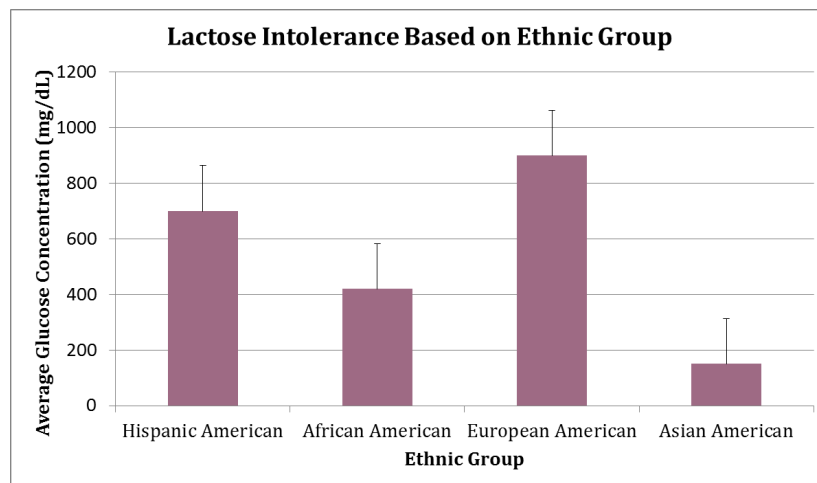

### Explanation of Data

3. A brief overall summary of your data. Discussion the descriptive statistics provided in table and the graph created using excel. (12 pts)
4. What does your p-value tell you about the different ethnic groups? Discuss if these groups are significantly different or not? (10 pts)

### Appendix 3: Lactose intolerance lab set up

#### Lactose Intolerance Lab Preparation Information

1. Make 100mL solutions by dissolving lactose powder into water. Autoclave and store in fridge.
  - **White Milk**
2. Make a solution of **100% Lactaid** according to instructions on the box (2 tablets in 100 mL of water).
3. Use **100% Lactaid** solution to prepare “**single race**” solutions as shown in chart below. *Save the rest in fridge or freezer.*
4. Use the “**single race**” solutions to prepare **Multi-racial patient samples** that students will use in lab. See chart below. *Save the rest in fridge or freezer*

| <i>“Single-race”<br/>Solution</i> | <i>Racial group</i> | <i>C2<br/>Final lactaid<br/>concentration</i> | <i>V1<br/>Volume of<br/>“100%” lactaid”<br/>solution<br/>(mL)</i> | <i>Water<br/>(mL)</i> | <i>V2<br/>Total Volume<br/>Needed<br/>(mL)</i> |
|-----------------------------------|---------------------|-----------------------------------------------|-------------------------------------------------------------------|-----------------------|------------------------------------------------|
| 1                                 | European American   | 100%                                          | 50                                                                | 0                     | 50mL                                           |
| 2                                 | African American    | 50%                                           | 25                                                                | 25                    | 50 mL                                          |
| 3                                 | Hispanic American   | 20%                                           | 10                                                                | 40                    | 50 mL                                          |
| 4                                 | Asian American      | 10%                                           | 5                                                                 | 45                    | 50 mL                                          |
| 5                                 | Native American     | 5%                                            | 2.5                                                               | 47.5                  | 50 mL                                          |

| <b>Multiracial Patient Samples</b> | <b>Racial Combinations</b>            | <b>Mix together as follows, total of 10mL</b> |
|------------------------------------|---------------------------------------|-----------------------------------------------|
| Patient A                          | European-American<br>African American | 5 mL Solution 1<br>5 mL Solution 2            |
| Patient B                          | African American<br>Hispanic          | 5 mL solution 2<br>5 mL solution 3            |
| Patient C                          | Asian American<br>European American   | 5 mL solution 1<br>5 mL solution 4            |
| Patient D                          | African American<br>Native American   | 5 mL solution 2<br>5 mL solution 5            |

#### Supplies per Lab Bench

- 10 mL Milk per bench
- 1 Waste bucket labeled “WASTE” per bench
- 2 Micropipettes p1000 (pre-set to 500ul) and p200 (pre-set to 100ul) per bench
- Micropipette tips
- 1 Microfuge rack per table
- 5 mL each of Patient samples A, B, C, D per table (4 of each patient per group – bench)
- 5 mL of water labeled “negative control solution” (4 per group – table)
- 5 mL of 10% glucose labeled “positive control solution” (4 per group – table)
- 2 Containers of Glucose test strips per table
- 2 Timers per table
- 2 Permanent Markers per table



Appendix 4: Lactose intolerance research proposal grading rubric

**LACTOSE INTOLERANCE RESEARCH PROPOSAL GRADING RUBRIC**

USE YOUR OWN HANDWRITING FOR EVERYTHING (exception = printed charts and graphs)

| <b>EXPERIMENTAL DESIGN ITEMS</b>                                                                                                                                                                                                                                                                                                                                                                                                                                                                                                                                                                                     | <b>Points Possible</b> | <b>Points Earned</b> |
|----------------------------------------------------------------------------------------------------------------------------------------------------------------------------------------------------------------------------------------------------------------------------------------------------------------------------------------------------------------------------------------------------------------------------------------------------------------------------------------------------------------------------------------------------------------------------------------------------------------------|------------------------|----------------------|
| <p><b>Background Information</b> (4 pts each)</p> <ul style="list-style-type: none"> <li>▪ Background information should be written in clear and complete sentences.</li> <li>▪ Explain what it means to be lactose intolerance.</li> <li>▪ Explain the relationship between lactase and lactose intolerance.</li> <li>▪ How do enzymes affect lactose intolerance?</li> <li>▪ What is the importance of your experimental variables on lactose intolerance?</li> <li>▪ What is the purpose of the experiment?</li> <li>▪ List of the references you used to complete the background information section.</li> </ul> | <b>28</b>              |                      |
| <p><b>Hypothesis:</b> that matches your experimental design. (3 pts each)</p> <ul style="list-style-type: none"> <li>▪ “<b>if then</b>” statement that clearly maps out the experiment</li> <li>▪ Explain the scientific reasoning behind your prediction</li> </ul>                                                                                                                                                                                                                                                                                                                                                 | <b>6</b>               |                      |
| <p><b>Materials &amp; Methods</b> (6 pts each)</p> <ul style="list-style-type: none"> <li>▪ Include all a list of materials need to conduct the experiment</li> <li>▪ Using complete sentence in future tense, summarize how you will carry out the experiment</li> </ul>                                                                                                                                                                                                                                                                                                                                            | <b>12</b>              |                      |
| <p><b>Variables:</b> Clearly describe, in complete sentences (2 pts each)</p> <ul style="list-style-type: none"> <li>▪ Does the experiment design match your hypothesis?</li> <li>▪ Control and Experimental (test) groups</li> <li>▪ Independent variable(s) and Dependent variable(s)</li> <li>▪ Standardized Variable(s)</li> </ul>                                                                                                                                                                                                                                                                               | <b>12</b>              |                      |
| <p><b>Data Analysis:</b> Explain how you will record your data. (3 pts each)</p> <ul style="list-style-type: none"> <li>▪ What will you measure?</li> <li>▪ What equipment will you use to measure it?</li> <li>▪ Which statistical methods will you use to analyze your data?</li> <li>▪ Which websites or computer programs did you use to analyze your data?</li> </ul>                                                                                                                                                                                                                                           | <b>12</b>              |                      |
| <p><b>Conclusions</b> (5 pts each)</p> <ul style="list-style-type: none"> <li>▪ In order to <b>reject</b> your hypothesis, describe the data you would need to see. Explain your reasoning.</li> <li>▪ In order to <b>accept</b> your hypothesis, describe the data you would need to see. Explain your reasoning.</li> </ul>                                                                                                                                                                                                                                                                                        | <b>10</b>              |                      |
| <b>Total Points</b>                                                                                                                                                                                                                                                                                                                                                                                                                                                                                                                                                                                                  | <b>80</b>              |                      |

**Additional Comments:**

Appendix 5: Lab journal grading rubric

**Lab Journal Grading Rubric**

*USE YOUR OWN HANDWRITING FOR EVERYTHING (exception = printed charts and graphs)*

| <b>LAB JOURNAL ITEMS</b>                                                                                                                                                                                                                                                                                                                                                                                                                                      | <b>Points Possible</b> | <b>Points Earned</b> |
|---------------------------------------------------------------------------------------------------------------------------------------------------------------------------------------------------------------------------------------------------------------------------------------------------------------------------------------------------------------------------------------------------------------------------------------------------------------|------------------------|----------------------|
| <b>Appearance</b> (2 pts each) <ul style="list-style-type: none"> <li>▪ Table of contents is present and accurate</li> <li>▪ Neat look, legible and pleasant to behold</li> <li>▪ Pages are numbered</li> <li>▪ Any charts, graphs, etc. are affixed inside the notebook (not sticking out)</li> <li>▪ Permanent Ink Only</li> </ul>                                                                                                                          | <b>10</b>              |                      |
| <b>Date for each entry</b>                                                                                                                                                                                                                                                                                                                                                                                                                                    | <b>4</b>               |                      |
| <b>Goal:</b> <i>What you plan to accomplish today during lab?</i>                                                                                                                                                                                                                                                                                                                                                                                             | <b>4</b>               |                      |
| <b>Notes</b> (2 pts each) <ul style="list-style-type: none"> <li>▪ Record any notes you took during lecture</li> <li>▪ Record any plans you made for designing experiments</li> <li>▪ State your hypothesis</li> <li>▪ Record data collected during the experiment</li> <li>▪ Describe methods and procedures used during the experiment</li> <li>▪ Make note of any problems or limitations during the experiment</li> </ul>                                 | <b>12</b>              |                      |
| <b>Results, Discussion and Reflection</b> (2 pts each) <ul style="list-style-type: none"> <li>▪ Was the goal accomplished?</li> <li>▪ Explain your results.</li> <li>▪ Provide data tables with descriptive statistics (<i>mean, std. dev, std. error, n</i>)</li> <li>▪ Provide data tables with p-values</li> <li>▪ Provide an overall summary of your study.</li> <li>▪ Do you accept or reject your hypothesis?</li> <li>▪ What did you learn?</li> </ul> | <b>14</b>              |                      |
| <b>Total Points</b>                                                                                                                                                                                                                                                                                                                                                                                                                                           | <b>44</b>              |                      |
| <b>***Bonus Points:</b> (1 pt. each) <ul style="list-style-type: none"> <li>▪ Pictures</li> <li>▪ Figures</li> <li>▪ Diagrams</li> <li>▪ Signature on each page detailing the experiment</li> </ul>                                                                                                                                                                                                                                                           |                        |                      |
| <b>Total Score</b>                                                                                                                                                                                                                                                                                                                                                                                                                                            |                        |                      |

**Appendix 6: Mini-poster evaluations and mock review panels**

Names of Group Members (Evaluators) \_\_\_\_\_ Date \_\_\_\_\_ Section \_\_\_\_\_

**MINI-POSTER EVALUATIONS**  
***Mock Review Panels of Final Posters from Previous Semesters***

Write number assigned to the mini- poster that your team will be evaluating: \_\_\_\_\_

*Evaluate the Mini-Poster. For each component of the Mini-Poster, circle a number 1-5.*

**1= Strongly Disagree, 2= Disagree, 3= Neutral, 4= Agree, 5= Strongly Agree**

|                                                                                  |   |   |   |   |   |
|----------------------------------------------------------------------------------|---|---|---|---|---|
| Observations are clearly written and thoroughly explained                        | 1 | 2 | 3 | 4 | 5 |
| Hypothesis is clearly worded.                                                    | 1 | 2 | 3 | 4 | 5 |
| Hypothesis is detailed; explains the scientific reasoning behind the prediction. | 1 | 2 | 3 | 4 | 5 |
| Procedure is clearly worded and easy to follow.                                  | 1 | 2 | 3 | 4 | 5 |
| Experimental approach is described accurately, including techniques              | 1 | 2 | 3 | 4 | 5 |
| Experimental design match the hypothesis                                         | 1 | 2 | 3 | 4 | 5 |
| Control and test groups match the hypothesis                                     | 1 | 2 | 3 | 4 | 5 |
| Independent (IV), Dependent variable (DV), and Constants described accurately    | 1 | 2 | 3 | 4 | 5 |
| IV and DV match the hypothesis                                                   | 1 | 2 | 3 | 4 | 5 |
| Statistical methods described accurately                                         | 1 | 2 | 3 | 4 | 5 |
| Provide the websites and statistical software used to conduct the analysis       | 1 | 2 | 3 | 4 | 5 |
| Tables organized, neat and easy to follow                                        | 1 | 2 | 3 | 4 | 5 |
| Data tables contain the statistics (mean, n, std. dev, SEM and p-values)         | 1 | 2 | 3 | 4 | 5 |
| Data tables includes units of measurement                                        | 1 | 2 | 3 | 4 | 5 |
| Appropriate graph is used                                                        | 1 | 2 | 3 | 4 | 5 |
| Graphs contain a title, labeled X-axis and Y-axis with accurate units            | 1 | 2 | 3 | 4 | 5 |
| Provides a detailed description of the results that matches the data             | 1 | 2 | 3 | 4 | 5 |
| Provides a brief overall summary of the study that matches the data              | 1 | 2 | 3 | 4 | 5 |
| Accurately accepted or rejected the hypothesis or found data to be inclusive     | 1 | 2 | 3 | 4 | 5 |
| Future directions provided and explained                                         | 1 | 2 | 3 | 4 | 5 |

Add up the **TOTAL POINTS**: \_\_\_\_\_

**MANDATORY:** Write a few sentences of constructive feedback.

## Appendix 7: Mock poster review panel follow-up self-reflection worksheet

### MOCK POSTER REVIEW PANEL REVIEW FOLLOW UP SELF-REFECTION WORKSHEET

1. Did you find the mock review panel of final posters from previous semester's activity useful? Explain your answer.
2. After completing the mock review panel of final posters from previous semesters, would you say it was **EASY** or **CHALLENGING** for you to work together to agree on a final score for the mini-posters? Explain your answer.
3. After completing the mock review panel of final posters from previous semesters, how did you feel about providing constructive feedback to another student scientist? Explain your answer.
4. After completing the mock review panel of final posters from previous semesters, how confident are you in constructing a mini-poster worthy of receiving an A for your grade? Explain your answer. (*Scale of **1** = Not Confident; **2** = Somewhat Confident; **3** = Neutral; **4** = Confident; **5** Very Confident*)

**Appendix 8: Lactose intolerance mini-poster grading rubric**

| <b>Lactose Intolerance: MINI-POSTER GRADING RUBRIC</b>                                                                                                                                                                                                                                                                                                                                                                   |                        |                      |
|--------------------------------------------------------------------------------------------------------------------------------------------------------------------------------------------------------------------------------------------------------------------------------------------------------------------------------------------------------------------------------------------------------------------------|------------------------|----------------------|
| <b>POSTER ITEMS AND GRADING CRITERIA</b>                                                                                                                                                                                                                                                                                                                                                                                 | <b>Points Possible</b> | <b>Points Earned</b> |
| <b>Observations</b> (2 pts each) <ul style="list-style-type: none"> <li>▪ Observations should be written in clear and complete sentences.</li> <li>▪ Explain the importance of investigating lactose intolerance.</li> <li>▪ Explain what it means to be lactose intolerance.</li> <li>▪ What is the research objective for the experiment?</li> <li>▪ Provide in-text citations and References in APA format</li> </ul> | 10                     |                      |
| <b>Hypothesis:</b> that matches your experimental design. (2 pts each) <ul style="list-style-type: none"> <li>▪ <b>“if then”</b> statement that clearly maps out the experiment</li> <li>▪ Explain the scientific reasoning behind your prediction</li> </ul>                                                                                                                                                            | 4                      |                      |
| <b>Materials &amp; Methods</b> (6 pts each) <ul style="list-style-type: none"> <li>▪ Using complete sentence in past tense, summarize how you conducted the experiment</li> <li>▪ Include all of the materials needed to conduct the experiment</li> </ul>                                                                                                                                                               | 12                     |                      |
| <b>Experimental Design:</b> Clearly describe, in complete sentences (2 pts each) <ul style="list-style-type: none"> <li>▪ Does the experiment design match your hypothesis?</li> <li>▪ Control and Experimental (test) groups</li> <li>▪ Independent variable(s) and Dependent variable(s)</li> <li>▪ Standardized Variable(s)</li> </ul>                                                                                | 12                     |                      |
| <b>Data Analysis</b> (3 pts each) <ul style="list-style-type: none"> <li>▪ What did you measure?</li> <li>▪ What equipment did you use to measure it?</li> <li>▪ Which statistical methods did you use to analyze your data?</li> <li>▪ Which websites or computer programs did you use to analyze your data?</li> </ul>                                                                                                 | 12                     |                      |
| <b>Data Tables</b> <ul style="list-style-type: none"> <li>▪ Complete, organized and neat tables (2pts each)</li> <li>▪ Appropriate labels and units (2 pts each)</li> <li>▪ Descriptive Statistics Data Tables (10 pts each) - Sample size, mean (average), Standard Deviation, and p-values</li> </ul>                                                                                                                  | 30                     |                      |
| <b>Graphs</b> <ul style="list-style-type: none"> <li>▪ Title and legend (1 pt. each)</li> <li>▪ Labeled X-axis with units and Y axis with units (1 pt. each)</li> <li>▪ Appropriate graph used of class data (with standard error bars) (5 pts each)</li> </ul>                                                                                                                                                          | 10                     |                      |
| <b>Results</b> <ul style="list-style-type: none"> <li>▪ Provides a detailed description of the results. (10 pts)</li> <li>▪ Which group(s) were significantly different at a p-value &lt;0.05? (3 pts)</li> <li>▪ Which group(s) showed no significant differences? (3 pts)</li> <li>▪ Did you experience any problems during the experiment? If so, how did you troubleshoot them? (4 pts)</li> </ul>                   | 20                     |                      |
| <b>Conclusions</b> <ul style="list-style-type: none"> <li>▪ Provide a brief overall summary of the study. 10 pts</li> <li>▪ Should you <b>accept</b> or <b>reject</b> the hypothesis? Or is your data inconclusive? 5 pts</li> <li>▪ Explain your reasoning. 5 pts</li> </ul>                                                                                                                                            | 20                     |                      |
| <b>Future Directions</b> <ul style="list-style-type: none"> <li>▪ To <b>extend</b> your knowledge, what experiment would you like to do next? Briefly explain what else you'd like to discover, based on your results.</li> </ul>                                                                                                                                                                                        | 5                      |                      |
| <b>Total Points</b>                                                                                                                                                                                                                                                                                                                                                                                                      | 135                    |                      |

## Appendix 9: Preparation sheet for enzyme inhibition and yeast microscopy lab activity

# Preparation Sheet for Enzyme Inhibition and Yeast Microscopy Lab Activity

### YEAST:

1. Pick a large 3mm colony (clone 9 or clone 10) into 5 mL SD-Ura or SD-Leu or SD-Trp.
2. Shake ~20hr at 30 degrees.
3. Measure OD600, it should be at least 1.0.
4. Make aliquots, 90 microliters per tube, 2 tubes per bench.

### SOLUTIONS

1. HCl 0.01M – make 5-10mL
2. Aliquot into tubes 50 microliters each, 2 tubes per bench.

### Each bench needs:

- 2 markers
- 2 Waste buckets
- 2 p20 micropipettors
- Pipet tips
- 2 Microfuge tube rack
- 2 tubes of yeast, 90 microliters each
- 2 tubes of 0.1M HCl, 50 microliters each
- 2 tube of deionized water, 500 microliters each
- Slides and coverslips
- 2 tube of methylene blue
- glass waste beaker

## Altering Enzyme Activity on Yeast Cells, Cell Viability & Microscopy Lab Worksheet

### OBJECTIVES

- Identify the parts of a light compound microscope
- Properly operate a light compound microscope
- Create a wet mount
- Explain altering enzyme activity on yeast cells
- Perform a viability assay to determine the number of *living* cells in a sample.
- Define “enzyme inhibition” and explain how to inhibit enzyme activity using hydrochloric acid (HCl)

### BACKGROUND

**YEASTS** are unicellular Fungi, the simplest eukaryotic cells. They are easy to grow in a laboratory, since their nutritional requirements and environmental needs are few.

- They prefer to grow at 20-30°C, but can tolerate a range of growth temperatures between ~4 – ~45°C. Temperatures that are too high or too low may interfere with enzyme function.
- Yeast need a source of energy and can metabolize various carbohydrates including monosaccharides, disaccharides and some polysaccharides for this.
- Yeast need peptides or amino acids synthesize their own proteins. They need a supply of nitrogen and phosphorus to synthesize their nucleic acids.
- Yeasts require an appropriate concentration of salts and various other ions, to maintain an osmotically and chemically favorable environment.
- Having the proper pH is a major aspect of maintaining a chemically favorable environment. Inside cells, enzymes can become unfolded or denatured at the wrong pH, which reduces or eliminates their activity.

**YEAST VIABILITY** – Viability refers to the ability of yeast cells to stay alive. Yeast are easy to grow but, also easy to injure or kill by removing what they need. For instance, yeast cannot live if their enzymes cannot function. In this activity we will alter the pH of yeast liquid cultures, which inhibits enzyme activity. Then we will determine if the viability of the yeast was impacted by the change in pH.

**MEASURING YEAST VIABILITY** –The simplest way to measure yeast cell viability is using a light microscope and a simple stain called ***methylene blue***, which stains DEAD yeast cells. When methylene blue is able to enter yeast cells it will make them appear blue. Yeast cells that are alive will appear clear or opaque because they are able to break down the methylene blue and so it disappears. Cells that are dead are unable to break methylene blue (or anything else) down – they have no metabolic activity. To measure yeast cell viability methylene blue is added to cells, then cells are observed using a light microscope and counted. Figure 1 shows what yeast cells would look like during a typical methylene blue viability assay, a viewed under conditions similar to what you will use. To calculate percent viability, simply divide the number of live (unstained) cells by the total number of cells seen and multiply by 100.

$$\text{Percent Viability} = (\text{number of live cells}/\text{total number of cells}) \times 100$$

### **BASIC CHEMISTRY REVIEW!**

([http://www.chem.purdue.edu/gchelp/howtosolveit/Equilibrium/Calculating\\_pHandpOH.htm](http://www.chem.purdue.edu/gchelp/howtosolveit/Equilibrium/Calculating_pHandpOH.htm))

**Calculating pH.** To calculate the pH of an aqueous solution you need to know the concentration of the hydronium ion in moles per liter (**molarity**). The pH is then calculated using the expression:

$$\text{pH} = -\log [\text{H}_3\text{O}^+].$$

**Example:** Find the pH of a 0.0025 M HCl solution. The HCl is a strong acid and is 100% ionized in water. The hydronium ion concentration is 0.0025 M. Thus:  $\text{pH} = -\log (0.0025) = -(-2.60) = 2.60$

**PROCEDURES** (*Work in groups of 2.*)

**Treat yeast with HCl to inhibit enzyme activity**

1. Locate 2 microfuge tubes containing yeast.
2. Using the p20 micropipette, add 10 microliters of HCl to one tube and 10 microliters of water to the other tube.
3. Vortex tubes ~10 sec to resuspend the yeast (disperse the cells evenly in the liquid).
4. Let tubes incubate on your bench for at least 20 minutes.

**Preparing and viewing wet mount (live) yeast slides**

1. Label one empty glass slide for each tube of yeast.
2. Vortex the yeast tube.
3. Add 5 microliters of yeast to the slide then add 5 microliters of methylene blue on the slide. **AVOID BUBBLES!**
4. Following the procedure demonstrated in blackboard, carefully place a coverslip at a 45 degree angle at the edge of the liquid on the slide. Slowly and carefully, let the coverslip gently fall over the liquid to cover it.  
**\*\*ANGLE and SLOW is important to reduce the chances of bubbles.**
5. Examine slide in a microscope, moving from total magnification of 40X → 100X → 400X.
6. Count a total of 50 cells per slide for the viability assay.
7. Enter data in Table 1.

**MICROSCOPE IMAGES OF YEAST SUSPENDED IN HYDROCHORLIC ACID AND WATER**

*Use the microscope to draw the yeast cells suspended in water and yeast cells suspended in HCl using the 40X objective lens (label each drawing with its TOTAL magnification).*

Indicating which yeast cells are dead or alive by labelling them on your drawings (**4pts**).

\_\_\_\_\_ X (2pts)

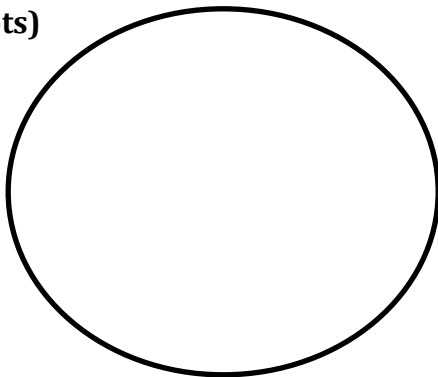

**HCL Yeast Sample**

\_\_\_\_\_ X (2pts)

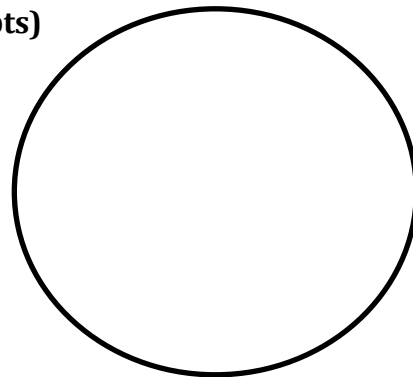

**Water Yeast Sample**

**RAW DATA TABLE**

**Table 1:** Yeast Survival in Water and HCL after a 20 Minute Incubation Period (**16 pts**)

| <b>Yeast Sample</b> | <b># Live Cells</b> | <b># Dead Cells</b> | <b>Total</b> | <b>% Live Cells</b> |
|---------------------|---------------------|---------------------|--------------|---------------------|
| <b>Water</b>        |                     |                     |              |                     |
| <b>HCL</b>          |                     |                     |              |                     |





Appendix 11: Alcohol fermentation and enzyme inhibition research proposal grading rubric

**ALCOHOL FERMENTATION AND ENZYME INHIBITION RESEARCH PROPOSAL**

USE YOUR OWN HANDWRITING FOR EVERYTHING (exception = printed charts and graphs)

| EXPERIEMENTAL DESIGN ITEMS                                                                                                                                                                                                                                                                                                                                                                                                                                                                                                                                                                                                                                                                       | Points Possible | Points Earned |
|--------------------------------------------------------------------------------------------------------------------------------------------------------------------------------------------------------------------------------------------------------------------------------------------------------------------------------------------------------------------------------------------------------------------------------------------------------------------------------------------------------------------------------------------------------------------------------------------------------------------------------------------------------------------------------------------------|-----------------|---------------|
| <p><b>Background Information</b> (4pts each)</p> <ul style="list-style-type: none"> <li>▪ Background information should be written in clear and complete sentences.</li> <li>▪ In your own words, summarize the alcoholic fermentation process.</li> <li>▪ Describe the environmental conditions that will cause yeast to carry out alcohol fermentation.</li> <li>▪ Discuss how an enzyme inhibitor that alters pH could stop enzymes from working.</li> <li>▪ In your own words, explain the incident at the brewery (<b>THE CASE</b>)</li> <li>▪ What is the purpose of the experiment?</li> <li>▪ List of the references you used to complete the background information section.</li> </ul> | 28              |               |
| <p><b>Hypothesis:</b> that matches your experimental design. (5 pts each)</p> <ul style="list-style-type: none"> <li>▪ <b>“if then”</b> statement that clearly maps out the experiment</li> <li>▪ Explain the scientific reasoning behind your prediction</li> </ul>                                                                                                                                                                                                                                                                                                                                                                                                                             | 10              |               |
| <p><b>Materials &amp; Methods</b> (6 pts each)</p> <ul style="list-style-type: none"> <li>▪ Include all a list of materials need to conduct the experiment</li> <li>▪ Using complete sentences in future tense, summarize how you will carry out the experiment</li> </ul>                                                                                                                                                                                                                                                                                                                                                                                                                       | 12              |               |
| <p><b>Variables:</b> Clearly describe, in complete sentences (2 pts each)</p> <ul style="list-style-type: none"> <li>▪ Does the experiment design match your hypothesis?</li> <li>▪ Control and Experimental (test) groups</li> <li>▪ Independent variable(s) and Dependent variable(s)</li> <li>▪ Standardized Variable(s)</li> </ul>                                                                                                                                                                                                                                                                                                                                                           | 12              |               |
| <p><b>Data Analysis:</b> Explain how you will record your data. (4 pts each)</p> <ul style="list-style-type: none"> <li>▪ What will you measure during this experiment?</li> <li>▪ What equipment will you use to measure it?</li> <li>▪ Explain why you will use the equipment.</li> <li>▪ Explain how you plan to use it.</li> <li>▪ Which statistical methods will you use to analyze your data?</li> <li>▪ Which websites or computer programs did you use to analyze your data?</li> <li>▪ Explain why you will use them to analyze your data.</li> </ul>                                                                                                                                   | 28              |               |
| <p><b>Conclusions</b> (5 pts each)</p> <ul style="list-style-type: none"> <li>▪ In order to <b>reject</b> your hypothesis, describe the data you would need to see. Explain your reasoning.</li> <li>▪ In order to <b>accept</b> your hypothesis, describe the data you would need to see. Explain your reasoning.</li> </ul>                                                                                                                                                                                                                                                                                                                                                                    | 10              |               |
| <p><b>Total Points</b></p>                                                                                                                                                                                                                                                                                                                                                                                                                                                                                                                                                                                                                                                                       | <b>100</b>      |               |

Appendix 12: Alcohol fermentation and enzyme inhibition mini-poster grading rubric

| ALCOHOL FERMENTATION AND ENZYME INHIBITION MINI-POSTER GRADING                                                                                                                                                                                                                                                                                                                                                                                                                                                                                                                                |                 |               |
|-----------------------------------------------------------------------------------------------------------------------------------------------------------------------------------------------------------------------------------------------------------------------------------------------------------------------------------------------------------------------------------------------------------------------------------------------------------------------------------------------------------------------------------------------------------------------------------------------|-----------------|---------------|
| POSTER ITEMS AND GRADING CRITERIA                                                                                                                                                                                                                                                                                                                                                                                                                                                                                                                                                             | Points Possible | Points Earned |
| <p><b>Observations</b> (2 pts each)</p> <ul style="list-style-type: none"> <li>▪ Observations should be written in clear and complete sentences.</li> <li>▪ What is fermentation?</li> <li>▪ Explain the incident at the microbrewery. <b>(IN YOUR OWN WORDS!)</b></li> <li>▪ What is the purpose of the experiment?</li> <li>▪ Provide in-text citations and references in APA format</li> </ul>                                                                                                                                                                                             | 10              |               |
| <p><b>Hypothesis:</b> that matches your experimental design. (2 pts each)</p> <ul style="list-style-type: none"> <li>▪ <b>“if then”</b> statement that clearly maps out the experiment</li> <li>▪ Explain the scientific reasoning behind your prediction</li> </ul>                                                                                                                                                                                                                                                                                                                          | 4               |               |
| <p><b>Materials &amp; Methods</b> (6 pts each)</p> <ul style="list-style-type: none"> <li>▪ Using complete sentence in future tense, summarize how you will carry out the experiment</li> </ul>                                                                                                                                                                                                                                                                                                                                                                                               | 6               |               |
| <p><b>Experimental Design:</b> Clearly describe, in complete sentences (2 pts each)</p> <ul style="list-style-type: none"> <li>▪ Does the experiment design match your hypothesis?</li> <li>▪ Control and Experimental (test) Groups</li> <li>▪ Independent Variable(s) and Dependent Variable(s)</li> <li>▪ Standardized Variable(s)</li> </ul>                                                                                                                                                                                                                                              | 12              |               |
| <p><b>Data Analysis</b> (3 pts each)</p> <ul style="list-style-type: none"> <li>▪ Which statistical methods did you use to analyze your data?</li> <li>▪ Which websites or computer programs did you use to analyze your data?</li> </ul>                                                                                                                                                                                                                                                                                                                                                     | 6               |               |
| <p><b>Data Tables</b> (one for fermentation pH and cell viability)</p> <ul style="list-style-type: none"> <li>▪ Complete, organized and neat tables (1pt each)</li> <li>▪ Appropriate labels and units (1 pt. each)</li> <li>▪ Descriptive Statistics Data Tables (10 pts each) - Sample size, Mean (average), Standard Deviation, Standard Error of the Mean and p-values</li> </ul>                                                                                                                                                                                                         | 45              |               |
| <p><b>Graphs</b> (one for fermentation pH, and cell viability)</p> <ul style="list-style-type: none"> <li>▪ Title and legend (1 pt. each)</li> <li>▪ Labeled X-axis with units and Y axis with units (1 pt. each)</li> <li>▪ Appropriate graph used of class data (with standard error bars) (5 pts each)</li> </ul>                                                                                                                                                                                                                                                                          | 27              |               |
| <p><b>Results</b></p> <ul style="list-style-type: none"> <li>▪ Provides a detailed description of the results. (10 pts)</li> <li>▪ Which group(s) were significantly different at a p-value &lt;0.05? (3 pts)</li> <li>▪ Which group(s) showed no significant differences? (3 pts)</li> <li>▪ Did you experience any problems during the experiment? If so, how did you troubleshoot them? (4 pts)</li> </ul>                                                                                                                                                                                 | 20              |               |
| <p><b>Conclusions</b></p> <ul style="list-style-type: none"> <li>▪ Provide a brief overall summary of the study. (10 pts)</li> <li>▪ Should you <b>accept</b> or <b>reject</b> the hypothesis? Or is your data inconclusive? (5 pts)</li> <li>▪ Was an inhibitor added to the suspected medium? If so, what evidence do you have to support your findings? (5pts)</li> <li>▪ Do the results support the claims of the brewery concerning the alleged contamination of the medium? (5 pts)</li> <li>▪ Should the employee be compensated for loss of work and rehired? Why? (8 pts)</li> </ul> | 33              |               |
| <p><b>Total Points</b></p>                                                                                                                                                                                                                                                                                                                                                                                                                                                                                                                                                                    | 153             |               |
| <p><b>***Bonus Points:</b> (1 pt. each)</p> <ul style="list-style-type: none"> <li>▪ Pictures</li> <li>▪ Diagrams</li> </ul>                                                                                                                                                                                                                                                                                                                                                                                                                                                                  |                 |               |

Appendix 13: SSP research proposal preparation follow-up self-reflection worksheet

Name \_\_\_\_\_

Section \_\_\_\_\_

**STUDENT SCIENTIST RESEARCH PROPOSAL PREPARATION FOLLOW UP SELF-REFLECTION WORKSHEET**

1. How beneficial did you find preparing your research proposal before starting your student scientist project (SSP)? Explain your answer. *(Scale of **1** = Not Beneficial; **2** = Somewhat Beneficial; **3** = Neutral **4** = Beneficial; **5** Very Beneficial)*
2. After preparing a research proposal, would you say it was **EASY** or **CHALLENGING** to work together to design a detailed experiment? Explain your answer.
3. How useful was the constructive feedback provided the committee that reviewed your proposal? Explain your answer. *(Scale of **1** = Not Useful; **2** = Somewhat Useful; **3** = Neutral; **4** = Useful; **5** Very Useful)*
4. After preparing a research proposal, how confident are you in carrying out your experiment? Explain your answer. *(Scale of **1** = Not Confident; **2** = Somewhat Confident; **3** = Neutral; **4** = Confident; **5** Very Confident)*
5. Did you feel like a student scientist while completing your research proposal? Explain your answer.
6. Discuss additional knowledge you gained from preparing the SSP research proposal.

Appendix 14: SSP research proposal grading rubric and mock peer-review panel feedback worksheet

| <b>TITLE OF STUDENT SCIENTIST RESEARCH PROPOSAL:</b>                                                                                                                                                                                                                                                                                                                                                                                                                                                                                                                                                                                                    |                        |                      |
|---------------------------------------------------------------------------------------------------------------------------------------------------------------------------------------------------------------------------------------------------------------------------------------------------------------------------------------------------------------------------------------------------------------------------------------------------------------------------------------------------------------------------------------------------------------------------------------------------------------------------------------------------------|------------------------|----------------------|
| <b>RESEARCH PROPOSAL GRADING RUBRIC CRITERIA</b> <i>TYPED ONLY</i>                                                                                                                                                                                                                                                                                                                                                                                                                                                                                                                                                                                      | <b>Points Possible</b> | <b>Points Earned</b> |
| <b>Background Information</b> <i>(4pts each)</i> <ul style="list-style-type: none"> <li>▪ Background information should be written in clear and complete sentences.</li> <li>▪ What is yeast fermentation?</li> <li>▪ Explain the effects of your independent variable on yeast fermentation.</li> <li>▪ Explain how the independent variable in your study potentially impact the enzymatic activity during yeast fermentation?</li> <li>▪ What is the importance of your experimental variables on yeast fermentation?</li> <li>▪ What is the purpose of the experiment?</li> <li>▪ Provide in-text citations and references in APA format</li> </ul> | <b>28</b>              |                      |
| <b>Hypothesis:</b> that matches your experimental design. <i>(5 pts each)</i> <ul style="list-style-type: none"> <li>▪ <b>“if then”</b> statement that clearly maps out the experiment</li> <li>▪ Explain the scientific reasoning behind your prediction</li> </ul>                                                                                                                                                                                                                                                                                                                                                                                    | <b>10</b>              |                      |
| <b>Materials &amp; Methods</b> <i>(6 pts each)</i> <ul style="list-style-type: none"> <li>▪ Include a list of all the materials need to conduct the experiment</li> <li>▪ Using complete sentence in future tense, summarize how you will carry out the experiment</li> </ul>                                                                                                                                                                                                                                                                                                                                                                           | <b>12</b>              |                      |
| <b>Variables:</b> Clearly describe, in complete sentences <i>(2 pts each)</i> <ul style="list-style-type: none"> <li>▪ Does the experiment design match your hypothesis?</li> <li>▪ Control and Experimental (test) groups</li> <li>▪ Independent variable(s) and Dependent variable(s)</li> <li>▪ Standardized Variable(s)</li> </ul>                                                                                                                                                                                                                                                                                                                  | <b>12</b>              |                      |
| <b>Data Analysis:</b> Explain how you will record your data. <i>(4 pts each)</i> <ul style="list-style-type: none"> <li>▪ What will you measure during this experiment?</li> <li>▪ What equipment will you use to measure it?</li> <li>▪ Explain why you will use the equipment.</li> <li>▪ Explain how you plan to use it.</li> <li>▪ Which statistical methods will you use to analyze your data?</li> <li>▪ Which websites or computer programs did you use to analyze your data?</li> <li>▪ Explain why you will use them to analyze your data.</li> </ul>                                                                                          | <b>28</b>              |                      |
| <b>Conclusions</b> <i>(5 pts each)</i> <ul style="list-style-type: none"> <li>▪ In order to <b>reject</b> your hypothesis, describe the data you would need to see. Explain your reasoning.</li> <li>▪ In order to <b>accept</b> your hypothesis, describe the data you would need to see. Explain your reasoning.</li> </ul>                                                                                                                                                                                                                                                                                                                           | <b>10</b>              |                      |
| <b>Rough Draft Attached</b>                                                                                                                                                                                                                                                                                                                                                                                                                                                                                                                                                                                                                             | <b>10</b>              |                      |
| <b>Reviewer Comments - Rough Draft</b>                                                                                                                                                                                                                                                                                                                                                                                                                                                                                                                                                                                                                  | <b>10</b>              |                      |
| <b>Total Points</b>                                                                                                                                                                                                                                                                                                                                                                                                                                                                                                                                                                                                                                     | <b>120</b>             |                      |

ADDITIONAL COMMENTS WILL BE PROVIDED ON THE BACK SIDE OF THIS DOCUMENT

# COMMENTS AND SUGGESTIONS FOR SCIENTISTS

*The reviewers need to provide a detailed explanation for their scores.*

***Does the title accurately describe the research study?***

***Introduction:***

***Hypothesis:***

***Methods and Materials:***

***Variables:***

***Data Analysis:***

***Conclusions:***

***Should this research proposal receive funding? Explain your answer.***

Appendix 15: SSP poster grading rubric

## STUDENT-SCIENTIST PROJECT – POSTER GRADING RUBRIC

\*YF = Yeast Fermentation and CV= Cell Viability

\*\*IV = Independent Variable, DV = Dependent Variable, EG = Experimental Groups, C= Constants, and CG = Control Groups

STUDENT NAME \_\_\_\_\_

Judge's Name \_\_\_\_\_

**Task Description:** A Poster Presentation environment similar to a Scientific Meeting is simulated for the student will act as scientist and present purpose, methods (including data analysis), results and conclusion (implications of the experiment) of your Student-Scientist project to the NCCU scientific community.

| Criterion                                                | Exemplary =4                                                                                                                                                                                                                                                                                                                                                                                                   | Competent = 3                                                                                                                                                                                                                                                                                                                                                                                                                          | Developing = 2                                                                                                                                                                                                                                                                                                                                                                                                                | No Attempt = 1                                                                                                                                                                                                                                                                                                                                                                    | Score |
|----------------------------------------------------------|----------------------------------------------------------------------------------------------------------------------------------------------------------------------------------------------------------------------------------------------------------------------------------------------------------------------------------------------------------------------------------------------------------------|----------------------------------------------------------------------------------------------------------------------------------------------------------------------------------------------------------------------------------------------------------------------------------------------------------------------------------------------------------------------------------------------------------------------------------------|-------------------------------------------------------------------------------------------------------------------------------------------------------------------------------------------------------------------------------------------------------------------------------------------------------------------------------------------------------------------------------------------------------------------------------|-----------------------------------------------------------------------------------------------------------------------------------------------------------------------------------------------------------------------------------------------------------------------------------------------------------------------------------------------------------------------------------|-------|
| <b>PRESENTER</b><br>TOTAL POINTS = 12                    | <input type="checkbox"/> Confident<br><input type="checkbox"/> Knowledgeable about project topic and accurate<br><input type="checkbox"/> Answered questions with the correct explanation and elaboration                                                                                                                                                                                                      | <input type="checkbox"/> Timid (Nervous)<br><input type="checkbox"/> Comfortable with the topic and accurate<br><input type="checkbox"/> Comfortable with answering questions but little elaboration                                                                                                                                                                                                                                   | <input type="checkbox"/> Hesitate (Second guessing themselves)<br><input type="checkbox"/> Uncomfortable with the topic, but the content is questionable<br><input type="checkbox"/> Uncomfortable with answering questions and does not elaborate                                                                                                                                                                            | <input type="checkbox"/> Unprepared<br><input type="checkbox"/> Do not know the concepts associated with the project<br><input type="checkbox"/> Does not answer questions                                                                                                                                                                                                        |       |
| <b>PRESENTATION OF THE RESEARCH</b><br>TOTAL POINTS = 24 | <input type="checkbox"/> Title specific and informative<br><input type="checkbox"/> Each author name is provided<br><input type="checkbox"/> Text font size is appropriate and consist for each section<br><input type="checkbox"/> Presentation is organized and easy to read<br><input type="checkbox"/> Written in clear English with no grammatical errors<br><input type="checkbox"/> Professional Attire | <input type="checkbox"/> Title specific, but not informative<br><input type="checkbox"/> One author name is omitted<br><input type="checkbox"/> Text font size is appropriate but not consist for each section<br><input type="checkbox"/> Presentation is organized and somewhat easy to read<br><input type="checkbox"/> Written in clear English with limited grammatical errors<br><input type="checkbox"/> Business Casual Attire | <input type="checkbox"/> Title not specific nor informative<br><input type="checkbox"/> Two author names are omitted<br><input type="checkbox"/> Text font size is not appropriate but inconsistent for each section<br><input type="checkbox"/> Presentation not easy to follow<br><input type="checkbox"/> Written in clear English with several grammatical errors<br><input type="checkbox"/> Semi-Business Casual Attire | <input type="checkbox"/> No Title<br><input type="checkbox"/> Two or more author names are omitted<br><input type="checkbox"/> Text font size is not inappropriate<br><input type="checkbox"/> Presentation is unorganized and difficult to follow<br><input type="checkbox"/> Not written in clear English and not grammatical correct<br><input type="checkbox"/> Casual Attire |       |
| <b>PROJECT DESIGN</b><br>TOTAL POINTS = 16               | <input type="checkbox"/> Project accurately introduced with purpose of experiment<br><input type="checkbox"/> Methods summary completely explained and accurate<br><input type="checkbox"/> Hypothesis provided and justified<br><input type="checkbox"/> Each variable clearly defined (IV, DV, EG, C and CG)                                                                                                 | <input type="checkbox"/> Project sufficiently introduced with purpose of experiment<br><input type="checkbox"/> Methods summary missing key components but accurate<br><input type="checkbox"/> Hypothesis provided but poorly justified<br><input type="checkbox"/> One variable group not defined                                                                                                                                    | <input type="checkbox"/> Project inadequately introduced with purpose of experiment<br><input type="checkbox"/> Methods summary missing key components and inaccurate<br><input type="checkbox"/> Hypothesis with no justification<br><input type="checkbox"/> Two or more variable not defined                                                                                                                               | <input type="checkbox"/> Project poorly introduced and does not contain a purpose of experiment<br><input type="checkbox"/> Methods incomplete and inaccurate<br><input type="checkbox"/> No Hypothesis<br><input type="checkbox"/> No defined variables                                                                                                                          |       |

| Criterion                                                    | Exemplary =4                                                                                                                                                                                                                                                                                                                                                   | Competent = 3                                                                                                                                                                                                                                                                                                                                     | Developing = 2                                                                                                                                                                                                                                                                                                                                     | No Attempt = 1                                                                                                                                                                                                                                                                                  | Score       |
|--------------------------------------------------------------|----------------------------------------------------------------------------------------------------------------------------------------------------------------------------------------------------------------------------------------------------------------------------------------------------------------------------------------------------------------|---------------------------------------------------------------------------------------------------------------------------------------------------------------------------------------------------------------------------------------------------------------------------------------------------------------------------------------------------|----------------------------------------------------------------------------------------------------------------------------------------------------------------------------------------------------------------------------------------------------------------------------------------------------------------------------------------------------|-------------------------------------------------------------------------------------------------------------------------------------------------------------------------------------------------------------------------------------------------------------------------------------------------|-------------|
| <b>RESULTS</b><br>TOTAL POINTS = 12                          | <input type="checkbox"/> Results clear, consistent and accurate<br><input type="checkbox"/> Includes all statistics (mean, std. dev. and p-values) for YF and CV<br><input type="checkbox"/> Significant differences between the groups are clearly indicated (both YF and CV)                                                                                 | <input type="checkbox"/> Results vague but accurate<br><input type="checkbox"/> Missing some statistical results but both YF and CV<br><input type="checkbox"/> Significant differences between the group are vague for YF and CV                                                                                                                 | <input type="checkbox"/> Results confusing but accurate<br><input type="checkbox"/> Only statistics for either yeast fermentation or cell viability are discussed<br><input type="checkbox"/> Significant differences between the groups indicated for either YF or CV                                                                             | <input type="checkbox"/> Results are contradictory and inaccurate<br><input type="checkbox"/> Statistics missing for both YF and CV<br><input type="checkbox"/> Significant differences are not explained or poorly explained                                                                   |             |
| <b>CONCLUSIONS AND FUTURE DIRECTION</b><br>TOTAL POINTS = 20 | <input type="checkbox"/> Overall study is clearly accurately summarized<br><input type="checkbox"/> Major implication of research stated<br><input type="checkbox"/> Hypothesis accepted or rejected clearly stated<br><input type="checkbox"/> Clearly describe limitations<br><input type="checkbox"/> Suggest a clear and accurate future research question | <input type="checkbox"/> Overall study is vaguely summarized<br><input type="checkbox"/> Major implications of research are vague<br><input type="checkbox"/> Hypothesis accepted or rejected is vaguely stated<br><input type="checkbox"/> Vaguely describe limitations<br><input type="checkbox"/> Suggest a vague question for future research | <input type="checkbox"/> Overall study inadequately summarized<br><input type="checkbox"/> Major implications of research incomplete<br><input type="checkbox"/> Hypothesis inadequately accepted or rejected<br><input type="checkbox"/> Inadequately describe limitations<br><input type="checkbox"/> Random, unrelated future research question | <input type="checkbox"/> Overall study summary not provided<br><input type="checkbox"/> Major implications not stated<br><input type="checkbox"/> Hypothesis accepted or rejected not stated<br><input type="checkbox"/> No limitations<br><input type="checkbox"/> No future research question |             |
| <b>FIGURES</b><br>TOTAL POINTS = 16                          | <input type="checkbox"/> Neat and easy to read<br><input type="checkbox"/> Accurate descriptive titles for both figures<br><input type="checkbox"/> X and Y axis labeled clearly with the proper units.<br><input type="checkbox"/> Mean & error bars accurately displayed for both YF and CV                                                                  | <input type="checkbox"/> Neat, but unclear<br><input type="checkbox"/> Accurate descriptive titles for one figures<br><input type="checkbox"/> X and Y axis labeled clearly without the proper units.<br><input type="checkbox"/> Mean & error bars accurately displayed only on one figure                                                       | <input type="checkbox"/> Neat and Confusing<br><input type="checkbox"/> Inaccurate descriptive titles for one or both figures<br><input type="checkbox"/> X and Y axis not labeled clearly but contains the proper units<br><input type="checkbox"/> Mean accurately displayed but error bars missing                                              | <input type="checkbox"/> Not neat and confusing<br><input type="checkbox"/> No descriptive titles for figures<br><input type="checkbox"/> X and Y axis without labeled axis and units<br><input type="checkbox"/> Graphs do not accurately represent the data                                   |             |
| <b>TABLES</b><br>TOTAL POINTS = 16                           | <input type="checkbox"/> Neat and easy to read<br><input type="checkbox"/> n-values provided and correct<br><input type="checkbox"/> Mean, Stdev & SEM accurately displayed with units (both YF & CV)<br><input type="checkbox"/> p-value table with descriptive title (both YF and CV)                                                                        | <input type="checkbox"/> Neat, but unclear<br><input type="checkbox"/> n-values provided but partially correct<br><input type="checkbox"/> Mean, Std. dev. & SEM accurately displayed but no units (both YF & CV)<br><input type="checkbox"/> p-value table without descriptive title (both YF & CV)                                              | <input type="checkbox"/> Neat and Confusing<br><input type="checkbox"/> n-values provided by not correct<br><input type="checkbox"/> Mean, Std. dev & SEM accurately displayed with units only on one table<br><input type="checkbox"/> p-value table for either YF or CV                                                                          | <input type="checkbox"/> Not neat and confusing<br><input type="checkbox"/> Missing n-values<br><input type="checkbox"/> Mean, Std. dev & SEM not accurately displayed on one or both YF & CV tables<br><input type="checkbox"/> Missing or incomplete p-values                                 |             |
| <b>EXTRA CREDIT</b><br>TOTAL POINTS = 4                      | <input type="checkbox"/> Microscope slide pictures with total magnification and descriptive title                                                                                                                                                                                                                                                              | <input type="checkbox"/> Microscope slides with total magnification but a poorly written title                                                                                                                                                                                                                                                    | <input type="checkbox"/> Microscope slides without total magnification but a poorly written title                                                                                                                                                                                                                                                  | <input type="checkbox"/> Microscope slide without a title or total magnification                                                                                                                                                                                                                |             |
| <b>Additional Comments:</b>                                  |                                                                                                                                                                                                                                                                                                                                                                |                                                                                                                                                                                                                                                                                                                                                   |                                                                                                                                                                                                                                                                                                                                                    | <b>TOTAL POINTS</b>                                                                                                                                                                                                                                                                             |             |
|                                                              |                                                                                                                                                                                                                                                                                                                                                                |                                                                                                                                                                                                                                                                                                                                                   |                                                                                                                                                                                                                                                                                                                                                    |                                                                                                                                                                                                                                                                                                 | <b>/116</b> |



# Appendix 16: Example of SSP poster competition winner (“Exemplary”)

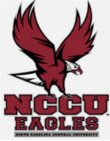

## Soda Sugar Effects on Fermentation Rates

Department of Biological & Biomedical Sciences, North Carolina Central University, Durham, NC

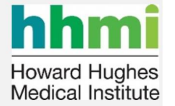

### INTRODUCTION

Yeast are single-celled eukaryotic organisms that reproduce asexually by budding in aerobic or anaerobic environments. Yeast need a carbon source for energy such as glucose. Glycolysis is used to breakdown the molecule of glucose into the two pyruvate molecules with the net of the two ATP produced during this cycle. Under anaerobic conditions yeast carries out the metabolic process that converts sugar into acids, gases, or alcohol. *Saccharomyces cerevisiae*, commonly known as Baker's yeast is used to carry out fermentation to produce wine, beer, bread, etc. In this study the sugar content effect on yeast was investigated. The sodas ginger ale, coke and sprite were used to supply the sugar source for the yeast to carry out fermentation process called yeast fermentation. Yeast fermentation was used to determine which soda would produce a higher carbon dioxide volume based off its their sugar content.

### OBJECTIVES

The objective of this experiment is to determine the effect of the sugar content in ginger ale, coke, sprite on yeast fermentation (CO<sub>2</sub> volume produced during 50 minutes monitoring period) and cell viability (percentage of live cells after 30 minutes).

### HYPOTHESIS

Under anaerobic conditions, if *saccharomyces cerevisiae* is added to the different sodas (ginger ale, coke and sprite), then the soda with the highest sugar content would produce a faster fermentation rate and a higher cell viability. Sprite contains the highest sugar content than the other sodas therefore, it will produce a faster fermentation rate and a higher cell viability.

### EXPERIMENTAL DESIGN

**Independent variable:** The sugar substrates in the different types of soda solutions.  
**Dependent variables:** CO<sub>2</sub> concentration when the samples are fermenting after being put in the incubator set at 30°C and cell viability when using a microscope.  
**Standardized Variables:** The amount of time spent while the fermentation apparatuses were in the incubator set at the 30°C, the type of yeast used and the amount of solution for the experimental variables and controls.  
**Control groups:** the positive control is glucose and the negative control is water.  
**Experimental groups:** Ginger ale Soda, Coke Soda, and Sprite Soda

### METHODOLOGY

3mL of 20% yeast solution was added to individual 15mL tubes containing 10mL of the control solutions (water and glucose) and the sodas (ginger ale, coke, and sprite). The 15mL tubes containing the yeast mixtures were then inverted into a individual 50 mL tube to assemble fermentation apparatus and to simulate an anaerobic environment. The fermentation apparatuses were then placed in an incubator set at 30°C so they can maintain a constant temperature. This incubation period was 50 minutes. Every 10 minutes the fermentation apparatuses were taken out to measure its CO<sub>2</sub> volume. After 30 minutes, 10 microliters was taken out of each yeast mixture from each apparatus and placed into the microcentrifuge tube containing the corresponding dilution solution. 5 microliters was taken out of each microcentrifuge tube and placed on an individual microscope slide and stained with 5 microliters of methylene blue. Each slide was placed under a compound microscope to determine the survival percentage of the yeast cells. **Statistical Methods:** standard deviation, mean, variance, and other functions in Microsoft Excel were used to present and interpret the data. Graphpad was used to conduct a t-test of the p-values for comparing the to the sodas to each other and to glucose.

### RESULTS AND DISCUSSION

The yeast fermentation rates and cell viability of the different types of sodas were compared based on there sugar content. On average coke produced the highest CO<sub>2</sub> volume(1.38mL ± 0.46mL). Therefore sprite soda produced the lowest CO<sub>2</sub> level(0.83mL ± 0.18mL). When analyzing the cell viability of the soda samples by using a microscope and we were able to see that Ginger Ale on an average was higher for the amount of live cells being (13.50% ± 12.02%) and Sprite soda was the lowest being (5.50% ± 3.54%). When calculating the p-values of sodas, it was determined they were not significantly different to each other because they value showed value higher than 0.05.

Yeast fermentation of data table yeast mixtures for glucose and sodas. (Table 1)

| Yeast Mixtures | Mean & Standard Deviation(ml) | SEM  |
|----------------|-------------------------------|------|
| Ginger Ale     | 1.10mL ± 0.28mL               | 0.20 |
| Coke           | 1.38mL ± 0.46mL               | 0.33 |
| Sprite         | 0.83mL ± 0.18mL               | 0.13 |
| Glucose        | 1.90mL ± 0.99mL               | 0.70 |

Yeast fermentation t-test results of the yeast mixtures for glucose and sodas.(Table 2)

|            | Ginger Ale | Coke   | Sprite | Glucose |
|------------|------------|--------|--------|---------|
| Ginger Ale |            |        |        |         |
| Ale        |            | 0.5460 | 0.3639 | 0.3864  |
| Coke       |            |        | 0.2550 | 0.5665  |
| Sprite     |            |        |        | 0.2697  |
| Glucose    |            |        |        |         |

Yeast cell viability t-test results of the yeast mixtures for glucose and sodas.(Table 4)

|            | Ginger Ale | Coke   | Sprite | Glucose |
|------------|------------|--------|--------|---------|
| Ginger Ale |            |        |        |         |
| Ale        |            | 0.6703 | 0.4619 | 0.2989  |
| Coke       |            |        | 0.6688 | 0.3445  |
| Sprite     |            |        |        | 0.3040  |
| Glucose    |            |        |        |         |

Yeast cell viability data table of the yeast mixtures for glucose and sodas.(Table 3)

| Yeast Mixture | Mean & Standard Deviation(%) | SEM   |
|---------------|------------------------------|-------|
| Ginger Ale    | 13.50% ± 12.02%              | 0.085 |
| Coke          | 8.50% ± 7.78%                | 0.055 |
| Sprite        | 5.50% ± 3.54%                | 0.025 |
| Glucose       | 1.50% ± 2.12%                | 0.015 |

CO<sub>2</sub> Production After Fermentation (Figure 1)

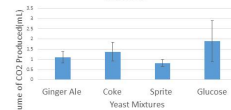

Cell Viability of Yeast Mixtures After 30 Minutes (Figure 2)

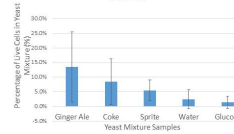

### CONCLUSIONS

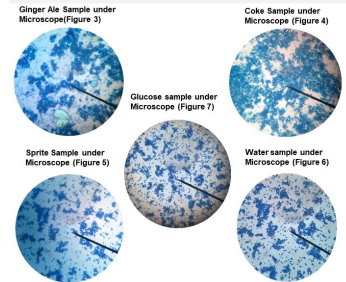

Our study shows that yeast fermentation rates and cell viability rates varied at differently in ginger ale, coke and sprite. In conclusion our hypothesis was rejected because coke actually produced a higher fermentation rate and cell viability even though coke did not contain as much sugar as sprite. These findings are important because people who enjoy making homemade sodas can find it very useful for natural carbonation. A limitation for this experiment would be not using a high amount of samples. If more samples were used results and data would be more accurate to analyze. Future Studies: Research shows that by making homemade sodas can be temperature dependent on the yeast fermentation. The same can be said with the production of wines.

### REFERENCES & ACKNOWLEDGEMENTS

- <https://www.fatsecret.com/calories-nutrition/sprite/sprite-12-oz>
- <http://www.thekitchn.com/summer-recipe-fresh-peach-soda-recipes-from-the-kitchn-192849>

We would like to acknowledge the funding from HHMI Precollege and Undergraduate Science Education Program (Grant # 52007553).

# Appendix 17: Example of SSP categorized as "Competent"

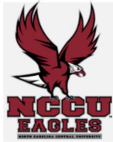

## The Best Substrate For Fermentation

Department of Biological & Biomedical Sciences, North Carolina Central University, Durham, NC

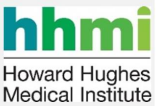

### INTRODUCTION

- Yeast fermentation is an anaerobic process where glycolysis is yielded, allowing a yeast solution to produce ethanol and carbon dioxide.
- The three natural sweeteners used were agave, honey, and maple syrup. *Saccharomyces cerevisiae* will be the yeast solution tested during the experiment.
- The monosaccharides that compose honey and maple syrup include glucose and fructose, sucrose.
- Agave stems from the cactus agave tequilana in Mexico. The carbohydrate composition is 70% fructose.
- The three natural sweeteners can be used in the manufacturing of beer and juices as a sweetener substitution.
- The GI (glycemic index) is lower in substrates that avoid crystallization and are in a loose or raw form. All three substrates have a low GI. GI rates determine how blood levels elevate due to glucose in the blood stream levels.

### OBJECTIVES

- The purpose of the experiment is to determine which natural sweetener will have the greatest effect on yeast fermentation in *saccharomyces cerevisiae*; in addition to calculating cell viability of substrates after a 30 min interval has passed.

### HYPOTHESIS

- If the substrate honey has a higher carbohydrate composition of glucose then more carbon CO<sub>2</sub> bubbles will be produced during fermentation.

### EXPERIMENTAL DESIGN

There was both a positive and negative control used during the experiment. The positive control is glucose and this is because there needs to be a presence of sugar in the experiment. The negative control is H<sub>2</sub>O because it breaks down glucose. The independent variables of this experiment are the substrates maple syrup, honey, and agave. Our dependent variables are the cell viability, CO<sub>2</sub> production, and fermentation. The experimental group includes substrates: agave, honey, and maple syrup. These substrates will be tested in order to see which will affect the yeast fermentation process. The standardized variables are time allotted during the incubation process. Methylene blue and the amount of the sweeteners used to conduct the experiment are also standardized variables.

### METHODOLOGY

- First, use a micropipette to transfer 3mL of yeast culture into a 15mL conical tube. In that same tube there will be 10mL of each substrate mixture. Pour yeast/experimental mixture into a 15mL tube with holes in the cap. Place each tube upside down into a fermentation apparatus. Mark along the sides to indicate the volume. Place the tubes into a tube rack and place the rack into an incubator set to 30°C. You will check the tubes every 10 minutes for a total of 50 minutes and collect the volume of how much CO<sub>2</sub> is produced. After 30 minutes, create a wet mount for each substrate mixture. You will add 5mL of the dilution solution and substrate mixture onto the slide and 5mL of methylene blue. You will check the cell viability of each wet mount. At the end of the three week period, we will normalize our data and average out the two sets of data collected from two groups. We averaged out our cell viability as well as yeast fermentation data collected over the 50 minute trial. Microsoft Excel was used to calculate descriptive statistics and Graphpad was used to determine the P-values of both the yeast fermentation and cell viability.

### RESULTS AND DISCUSSION

Table One: P-Values of Cell Viability in Substrates

| T-Test P-values | Maple Syrup | Honey  | Agave  | Glucose |
|-----------------|-------------|--------|--------|---------|
| Maple Syrup     |             | 0.0505 | 0.0001 | 0.0451  |
| Honey           |             |        | 0.0001 | 1.0000  |
| Agave           |             |        |        | 0.0001  |
| Glucose         |             |        |        |         |

Table 1: This table displays the p-values of the cell viability for the 3 substrates and positive control over a 3week period. Maple Syrup and honey, as well as glucose and maple syrup was statistically significant. This shows us that our hypothesis was incorrect and that maple syrup affected the CO<sub>2</sub> production in yeast fermentation.

Table 2: Descriptive Statistics Of Substrates

| Descriptive Statistics | Agave   | Honey  | Syrup   | Glucose |
|------------------------|---------|--------|---------|---------|
| X                      | 10mL    | 8.75mL | 9.25mL  | 11mL    |
| X                      | 10.5mL  | 9.75mL | 11.75mL | 11.5mL  |
| X                      | 10.25mL | 9.75mL | 10.5mL  | 8.25mL  |
| Average                | 10.25mL | 9.42mL | 10.5mL  | 10.25mL |
| STDEV                  | .25mL   | .60mL  | 1.25mL  | 1.75mL  |
| Standard Error         | 0.14mL  | 0.33mL | 0.72mL  | 1.01mL  |

Table 2: This chart is the yeast fermentation average over a 3week period. In the table above the descriptive statistics are included. We averaged out the volume for each substrate and positive control over the three week period. Above, the descriptive statistics include standard deviation, average, and standard error.

Table 3: P-Values of Yeast Fermentation

| AGAVE | HONEY  | SYRUP  | GLUCOSE |
|-------|--------|--------|---------|
|       | 0.0433 | 0.7084 | 1.000   |
|       |        | 0.1703 | 0.8239  |
|       |        |        | 0.1703  |

Table 3: This table displays the average p-values of the a three week period. In the table above honey is statistically significant.

Figure 1: Which Substrate will affect Yeast Fermentation? Cell Viability Figure

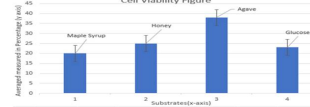

Figure 1: This figure displays the cell viability average of the three substrates and the positive control. The average shows on which substrate had the highest and lowest amount of live cells in this experiment. The average displays Maple Syrup had the least amount of live cells under the microscope. Agave had the highest amount of live cells out of the 4 tested variables. This supports the fact that maple syrup was the substrate that affected the yeast fermentation process. The average is measured in percentage.

Figure 2: Average of Yeast Fermentation for Substrates

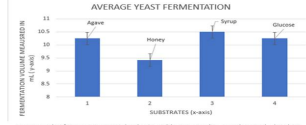

Figure 2: This figure represents the data in table 2 over a three week period. This data shows the averaged out the volume for each substrate and positive control over the 3 week period. Above, the descriptive statistics include standard deviation, average, and standard error.

Table 4: Descriptive Statistics of Cell Viability

| Descriptive Statistics | Agave   | Honey   | Syrup    | Glucose  |
|------------------------|---------|---------|----------|----------|
| Week 1                 | 36      | 24.5    | 20       | 22       |
| Week 2                 | 37.4    | 23      | 21.5     | 24       |
| Week 3                 | 36      | 24      | 21.5     | 22       |
| Average                | 36%     | 24%     | 22%      | 23%      |
| Standard Deviation     | 1.72240 | 1.16904 | 1.632993 | 1.048880 |
| Standard Error         | 1       | 5       | 7        | 9        |
| Standard Error         | 0.70316 | 0.47226 | 0.666667 | 0.428174 |
| Error                  | 7       | 3       |          | 4        |

Table 4: This chart represents the cell viability over a three week period. Above displays the descriptive statistics of cell viability for the three substrates and positive control. We averaged out our viability in order to find the average, standard deviation, and standard error. One can see that Maple Syrup had the lowest amount of live cells.

### CONCLUSIONS

- Using the bakers yeast, the results show that maple syrup goes through the fermentation process the quickest (10.5mL) while the honey goes through fermentation the slowest (9.42mL). With agave and glucose in the middle (10.25mL)
- The hypothesis was incorrect, Maple Syrup had the most amount of CO<sub>2</sub> bubbles by 1.08mL from honey which was the least amount. This is because maple syrup has the highest carbohydrate composition of glucose
- These results are important because a natural sweetener such as maple syrup can be used instead of the processed sugar we use today.
- Limitations with the experiment was not having the incubator at 30°C the entire time through the intervals. This is because there were other groups using the incubator. Another limitation was not having the exact measurements while using the micropipettes during the transfer process to do the microscope slides because the substrate would get stuck on the side of the tube. This limited the results because not all of the sample would be on the microscope slide. So the cell viability may have been thrown off a little.
- FUTURE STUDIES: Instead of doing a 50 minute trial, we would test it for a hour so that we can get a better representation of the CO<sub>2</sub> production. If we conducted this experiment for a month would that change our results?

### REFERENCES & ACKNOWLEDGEMENTS

Bogdanov, S., Jurendic, T., Sieber, R, Gallmann, P. Honey for nutrition and health: A Review. J. Am. Coll. Nutr. 2008, 27, 677-689

White, J.W. Jr. 1980. Detection of Honey Adulteration by Carbohydrate Analysis. JAOAC. 63(1): 11-18.

Osley, M.A., and D Norris. "The Two Gene Pairs Encoding H2A and H2B Play Different Roles in the *Saccharomyces Cerevisiae* Life Cycle." Molecular and Cellular Biology 7 (1987): 3473-3481. Biological Sciences. Illumina. Murphy Library. La Crosse, WI. 25 April 2007.

USDA. 1962. White, J.W. Jr. et al. Composition of American of American Honey. Tech. Bull. 1261. Agricultural Research Service, USDA, Washington, DC.

We would like to acknowledge the funding from HHMI Precollege and Undergraduate Science Education Program (Grant # 52007553).

# Appendix 18: Example of SSP categorized as “Developing”

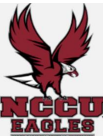

## How Does Various Temperatures Effect Yeast Fermentation and Cell Viability.

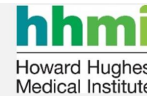

Department of Biological & Biomedical Sciences, North Carolina Central University, Durham, NC

### INTRODUCTION

Saccharomyces cerevisiae otherwise known as baker's yeast, is used in winemaking, baking, and brewing. Saccharomyces cerevisiae is not only used for food and drink consumption but it can be used as over the counter medicine for common colds and flu symptoms.

This yeast ferments differently when it is under different temperatures. The research question of this experiment is: How does various temperatures effect yeast fermentation and cell viability? Saccharomyces cerevisiae was used in this experiment. When temperatures are high, yeast tend to ferment quickly but when temperatures are low yeast takes a longer time to ferment. temperatures also plays an effect on the cell viability rate. If temperatures are too high, or too low the cells may be killed. It is imperative to know the effect temperatures have on yeast fermentation, because it will allow you to know what environment is best to produce yeast in.

This experiment was conducted for the purpose of determining whether yeast fermented faster in hot(60°C), cold(9°C), or room temperatures(22°C).

### OBJECTIVES

- Our objective is to find the optimal temperature for yeast fermentation
- We are researching this to see how various temperatures affect the yeast fermentation process.
- These various temperatures being an ice bath(9°C), room temperature(22°C), and a hot bath(60°C)

### HYPOTHESIS

If the yeast is fermented at various temperatures being 9°C, 22°C, 60°C and they all have different outcomes, then it can be assumed that the yeast ferments better in one temperature than the other based off the average fermentation rate, and cell viability

There are optimal growing temperatures that yeast thrive in which is between (20°C-30°C). Outside of those optimal temperatures the yeast fermentation process will be hindered. If the temperature becomes too low around (10°C), then the enzyme reaction will slow to a point where it won't work. If the temperature becomes too high around (40°C), then the enzymes will denature and unfold and becomes inactive.

### EXPERIMENTAL DESIGN

The control group for this experiment is the room temperature deionized water. The experimental group and the independent variable for this experiment is the 9°C cold bath, 22°C room temperature and the 60°C heated bath. The dependent variable for the experiment would be the fermentation rate of the 20% yeast and 5% glucose solution. The standardized variables would be the amount of time to ferment the 20% yeast, 5% glucose, dilution solution and deionized water.

### METHODOLOGY

- Use a transfer pipette to transfer 3 mL of the 20% yeast solution directly into the 15 mL conical tube containing 10 mL of 5% glucose solution.
- Shake and pour 20% yeast and 5% glucose solution into 15 mL tube with holes in cap
- After pouring solution into the slip conical tube over and invert tube
- Take initial volume and place fermentation apparatus in incubator, refrigerator, and heated bath.
- Every 10 minutes mark the volume of the rate of fermentation for 50 minutes
- After 30 minutes of fermentation make a wet mount from the fermentation apparatus that was place in the incubator, refrigerator, and heated bath. Using 10 µl of the yeast solution and 10 µl of the dilution solution. Mix and take 5 µl of that solution. And stain with 5 µl of 0.1% methylene blue
- Place experimental solution back in its appropriate place and examine wet mounts under the microscope
- During this experiment, we used measured the fermentation rate of saccharomyces cerevisiae and the cell viability of fermented saccharomyces cerevisiae.
- The website that we will be using to analyze the data is graphpad. We will be using graphpad to conduct the test which will compare the means of the experimental group and the control group and calculate the p-values. We will also be using microsoft excel too, we will be using microsoft excel to calculate the mean, standard deviation, standard error of the mean, and to create graphs.

### RESULTS AND DISCUSSION

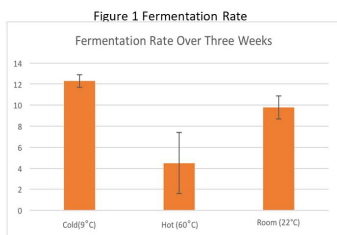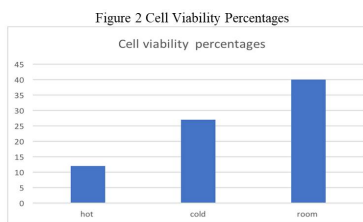

| experimental variables | Sample size | Mean | Stdev | Std Error |
|------------------------|-------------|------|-------|-----------|
| Cold(9°C)              | 6           | 12.3 | 0.6   | .3        |
| Hot(60°C)              | 6           | 4.5  | 2.9   | 1.2       |
| Room temp(22°C)        | 6           | 9.8  | 1.1   | .5        |

| experimental variables | Cell viability |
|------------------------|----------------|
| Cold                   | 27%            |
| Hot                    | 12%            |
| Room temperature       | 40%            |

- Figure 1 is a bar graph that shows the results of the yeast fermentation in different temperatures.
- Table 1 is a table that shows the summary of the data collected over the three week period
- Figure 3 is a bar graph that shows results of the cell viability from the total amount of live and dead cells from the three weeks of research.
- Table 2 displays the percentages of the cell viability in the samples
- The hot temperature samples had an average of 12.5 ml yeast fermentation after 3 weeks of collecting data.
- The room temperature samples had an average of 9.8 ml yeast fermentation after 3 weeks of collecting data.
- The cold temperature samples had an average of 4.5 ml yeast fermentation after 3 weeks of collecting data.

The experimental groups were extremely significantly different from the control. The p-values were less than 0.05.

### CONCLUSIONS

Overall results show that yeast ferments faster in hot temperatures (60°C). Room temperature (22°C) had an average of 9.75ml fermentation, cold temperature (9°C) had an average of 4.45ml, and the hot temperature (60°C) had an average of 12.25ml. Results prove that the higher temperature worked as an enzyme, while the colder temperature worked as an inhibitor. This is proven because the higher the temperature the faster the yeast fermented, but for the lower temperature the yeast barely fermented. For cell viability, results showed that yeast is mostly likely to have a higher cell viability rate in room temperature, which is understandable because the optimum temperature for yeast is 20-30°C. Room temperature (22°C) had a cell viability rate of 40%, hot temperature (60°C) had a cell viability rate of 12%, and cold temperature (9°C) had a cell viability rate of 27%. Room temperature had a higher cell viability rate than the other two experimental variables, because it was placed in the optimum temperatures, so the cells were able to thrive. The hot temperature, and cold temperature were not the appropriate environment for the yeast so they were killed.

Our hypothesis was accepted because the he data showed that one of the temperatures in fact did act more as an inhibitor than the other two different temperatures causing for a lower fermentation rate and lower cell viability in the yeast cell. This is because the temperature would have acted as an enzyme and slowed the reaction down.

These results are important because they can be used to effectively ferment yeast. These results will allow bakers, and anyone else know at what temperature yeast ferments the best, and the worst.

Limitation during this experiment includes: the incubator being left open, timers not being set, the hot bath was not prepared, the thermometer was broken for the cold samples.

At what room temperature degrees does yeast ferments the best. We would like to perform the same experiment with the variable being room temperature at different degrees.

### REFERENCES &

#### ACKNOWLEDGEMENTS

MA, Moyad. "Brewer's/Baker's Yeast (Saccharomyces Cerevisiae) And Preventive Medicine: Part II. - Pubmed - NCBI". *Ncbi.nlm.nih.gov*. N.p., 2017. Web.

- GraphPad QuickCalcs: t test calculator. Web.

We would like to acknowledge the funding from HHMI Precollege and Undergraduate Science Education Program (Grant # 52007553).



## Appendix 19: Student self-reflection responses about student-scientist curriculum

**QUESTION:** "Did you find the mock review panel of final posters from previous semesters activity useful?"

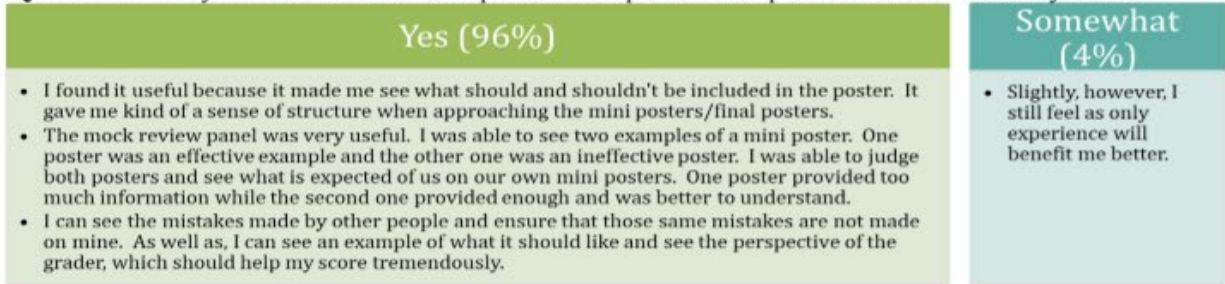

**QUESTION:** "Did you feel like a student-scientist while completing your research proposal?"

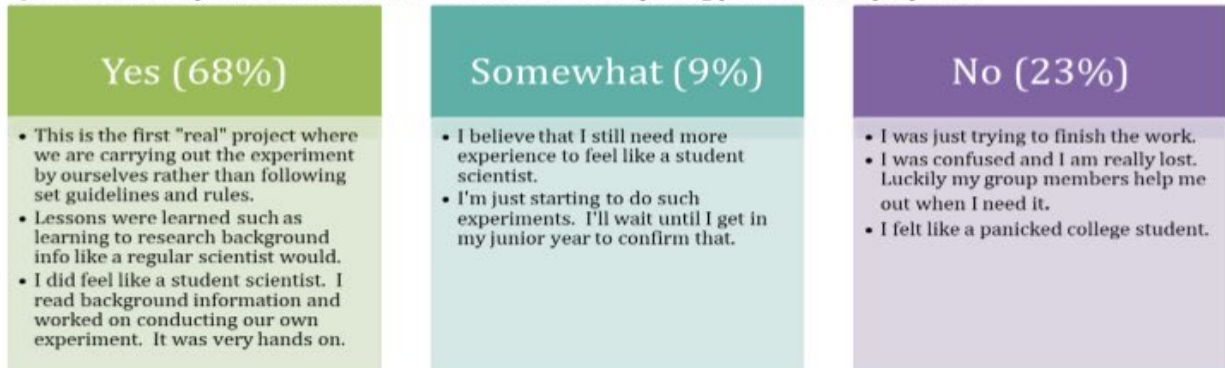

**QUESTION:** "Did you feel like a student-scientist while completing your research experiment?"

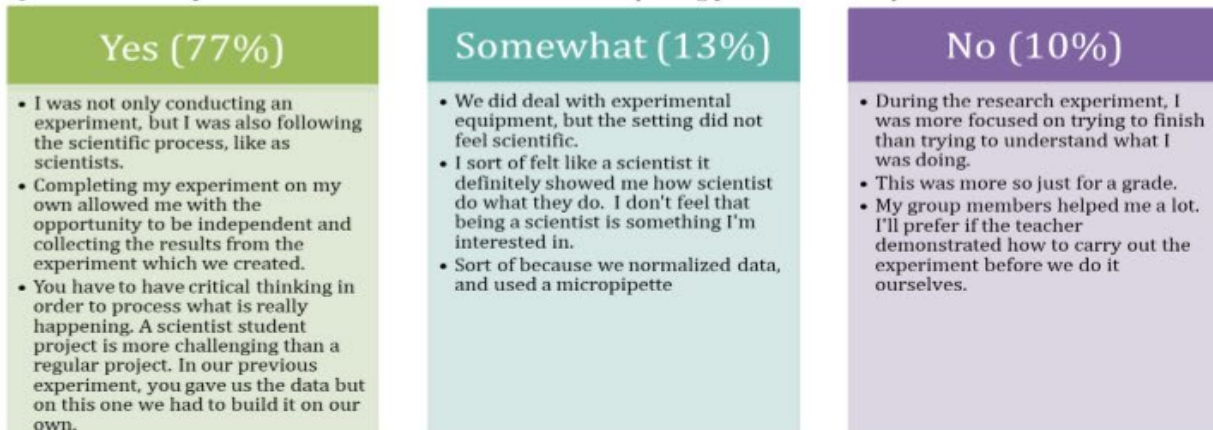

**QUESTION:** "After completing the student-scientist project, what are your thoughts about executing the scientific process and conducting a research project?"

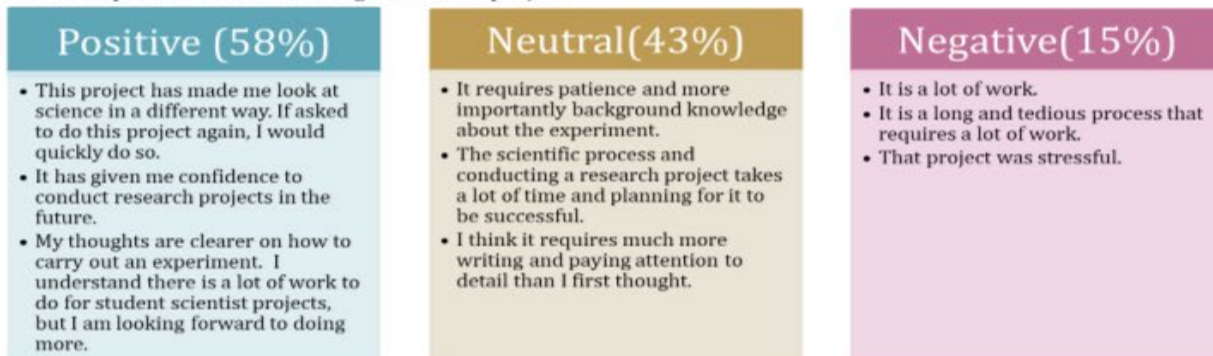

**QUESTION:** "Would you recommend a student-scientist curriculum to your friends?"

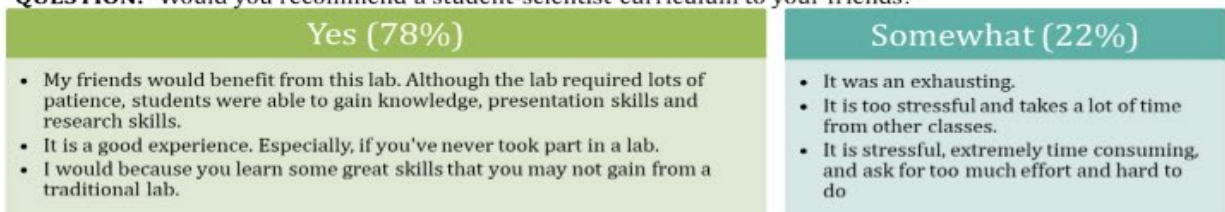

Supplement: JMBE-21-74SM.pdf [file JMBE-21-74SM.pdf]
